# Supplementary material
Source: PubMed Central journal article supplement (PMC8106720)
Supplement: JCM.02459-20-s0001.pdf [file JCM.02459-20-s0001.pdf]

1       **Evaluation of Optimal Blood Culture Incubation Time to Maximize Clinically Relevant**  
2       **Results from a Contemporary Blood Culture Instrument and Media System**

3       Eric M. Ransom<sup>1</sup>, Zahra Alipour<sup>1</sup>, Meghan A. Wallace<sup>1</sup>, and Carey-Ann D. Burnham<sup>1,2,3\*</sup>

4  
5       <sup>1</sup>Department of Pathology and Immunology, Washington University School of Medicine, St.  
6       Louis, MO

7       <sup>2</sup>Department of Molecular Microbiology, Washington University School of Medicine, St. Louis,  
8       MO

9       <sup>3</sup>Departments of Pediatrics and Medicine, Washington University School of Medicine, St. Louis,  
10       MO

11       \*Address correspondence to this author at: 660 South Euclid Ave., Campus Box 8118, St. Louis,  
12       MO 63110. Fax: 314-362-1461; e-mail [cburnham@wustl.edu](mailto:cburnham@wustl.edu).

13  
14       Running header: VIRTUO Blood Culture Incubation Time

15       Abbreviations list: HACEK: *Haemophilus*, *Aggregatibacter*, *Cardiobacterium*, *Eikenella*, and  
16       *Kingella* species

17  
18       Keywords: Blood culture, VIRTUO, Time to Positivity, BACT/ALERT, FA, FN, *Staphylococcus*  
19       *aureus*, Growth Rate

20 Table S1: Bottle count by recovered species or grouping. Only species recovered from at least twenty  
 21 bottles are shown. There is an important distinction between this table and Table 1 accounting for count  
 22 differences. Table 1 refers to the number of bottles containing a given species. This is not “weighted” so  
 23 if a bottle had two isolates of the same species, it is only counted as one bottle. On the other hand, Table  
 24 S1 contains data for each occurrence of a species isolate.

| Reported Species or Grouping                   | Total Count | % of Positive Bottles | % of All Bottles |
|------------------------------------------------|-------------|-----------------------|------------------|
| <i>Staphylococcus aureus</i>                   | 4,199       | 30.9%                 | 2.65%            |
| Coagulase-negative <i>Staphylococcus</i> spp.* | 2,215       | 16.3%                 | 1.40%            |
| <i>Escherichia coli</i>                        | 1,452       | 10.7%                 | 0.91%            |
| <i>Staphylococcus epidermidis</i>              | 1,438       | 10.6%                 | 0.91%            |
| <i>Klebsiella pneumoniae</i>                   | 510         | 3.8%                  | 0.32%            |
| <i>Enterococcus faecalis</i>                   | 485         | 3.6%                  | 0.31%            |
| <i>Enterococcus faecium</i>                    | 417         | 3.1%                  | 0.26%            |
| <i>Pseudomonas aeruginosa</i>                  | 307         | 2.3%                  | 0.19%            |
| Viridans group streptococci*                   | 243         | 1.8%                  | 0.15%            |
| <i>Proteus mirabilis</i>                       | 213         | 1.6%                  | 0.13%            |
| <i>Streptococcus mitis</i> group               | 208         | 1.5%                  | 0.13%            |
| <i>Streptococcus pneumoniae</i>                | 192         | 1.4%                  | 0.12%            |
| <i>Serratia marcescens</i>                     | 172         | 1.3%                  | 0.11%            |
| <i>Enterobacter cloacae</i> complex            | 163         | 1.2%                  | 0.10%            |
| <i>Staphylococcus hominis</i>                  | 159         | 1.2%                  | 0.10%            |
| <i>Streptococcus agalactiae</i>                | 150         | 1.1%                  | 0.09%            |
| <i>Staphylococcus capitis</i>                  | 147         | 1.1%                  | 0.09%            |
| <i>Cutibacterium</i> spp.                      | 121         | 0.8%                  | 0.07%            |
| <i>Streptococcus dysgalactiae</i>              | 113         | 0.8%                  | 0.07%            |
| <i>Staphylococcus haemolyticus</i>             | 106         | 0.8%                  | 0.07%            |
| <i>Candida glabrata</i>                        | 104         | 0.7%                  | 0.06%            |
| <i>Bacillus</i> spp., not <i>B. anthracis</i>  | 101         | 0.7%                  | 0.06%            |
| <i>Corynebacterium</i> spp.                    | 96          | 0.7%                  | 0.06%            |
| <i>Candida albicans</i>                        | 84          | 0.6%                  | 0.05%            |
| <i>Klebsiella variicola</i>                    | 81          | 0.6%                  | 0.05%            |
| <i>Bacteroides fragilis</i> group              | 79          | 0.6%                  | 0.05%            |
| <i>Staphylococcus lugdunensis</i>              | 69          | 0.5%                  | 0.04%            |
| <i>Enterobacter aerogenes</i>                  | 67          | 0.5%                  | 0.04%            |
| <i>Streptococcus pyogenes</i>                  | 64          | 0.5%                  | 0.04%            |
| <i>Streptococcus salivarius</i> group          | 63          | 0.5%                  | 0.04%            |
| <i>Corynebacterium striatum</i>                | 56          | 0.4%                  | 0.04%            |
| <i>Micrococcus</i> spp.                        | 56          | 0.4%                  | 0.04%            |

|                                     |    |      |       |
|-------------------------------------|----|------|-------|
| <i>Candida parapsilosis</i>         | 50 | 0.4% | 0.03% |
| <i>Klebsiella oxytoca</i>           | 46 | 0.3% | 0.03% |
| No organism recovered               | 46 | 0.3% | 0.03% |
| <i>Streptococcus bovis</i> group    | 45 | 0.3% | 0.03% |
| <i>Streptococcus anginosus</i>      | 43 | 0.3% | 0.03% |
| <i>Candida tropicalis</i>           | 40 | 0.3% | 0.03% |
| Coryneform bacteria*                | 33 | 0.2% | 0.02% |
| <i>Haemophilus influenzae</i>       | 29 | 0.2% | 0.02% |
| <i>Morganella morganii</i>          | 28 | 0.2% | 0.02% |
| <i>Parvimonas micra</i>             | 28 | 0.2% | 0.02% |
| <i>Streptococcus constellatus</i>   | 27 | 0.2% | 0.02% |
| <i>Actinomyces</i> species          | 26 | 0.2% | 0.02% |
| <i>Salmonella</i> species           | 26 | 0.2% | 0.02% |
| <i>Stenotrophomonas maltophilia</i> | 26 | 0.2% | 0.02% |
| <i>Acinetobacter</i> species        | 25 | 0.2% | 0.02% |
| <i>Lactobacillus rhamnosus</i>      | 25 | 0.2% | 0.02% |
| <i>Clostridium perfringens</i>      | 23 | 0.2% | 0.02% |
| <i>Staphylococcus schleiferi</i>    | 23 | 0.2% | 0.01% |
| <i>Lactobacillus</i> species        | 22 | 0.2% | 0.01% |
| <i>Citrobacter freundii</i> complex | 21 | 0.2% | 0.01% |
| <i>Eggerthella lenta</i>            | 21 | 0.2% | 0.01% |

25 \*not otherwise specified
